1

# Towards AI-based Precision Rehabilitation via Contextual Model-based Reinforcement Learning

Dongze Ye

Computer Science, University of Southern California, Los Angeles, USA

Haipeng Luo

Computer Science, University of Southern California, Los Angeles, USA

Carolee Winstein

Biokinesiology and Physical Therapy, University of Southern California, Los Angeles, USA

Nicolas Schweighofer \*

Biokinesiology and Physical Therapy, University of Southern California, Los Angeles, USA

\* Corresponding author

Email: [schweigh@usc.edu](mailto:schweigh@usc.edu)

## 19 Abstract

20 **Background.** Stroke is a condition marked by considerable variability in lesions, recovery trajectories, and  
21 responses to therapy. Consequently, precision medicine in rehabilitation post-stroke, which aims to deliver  
22 the “right intervention, at the right time, in the right setting, for the right person,” is essential for  
23 optimizing stroke recovery. Although Artificial Intelligence (AI) has been effectively utilized in other  
24 medical fields, such as cancer and sepsis treatments, no current AI system is designed to tailor and  
25 continuously refine rehabilitation plans post-stroke.

26 **Methods.** We propose a novel AI-based decision-support system for precision rehabilitation that uses  
27 Reinforcement Learning (RL) to personalize the treatment plan. Specifically, our system iteratively adjusts  
28 the sequential treatment plan—timing, dosage, and intensity— to maximize long-term outcomes based on  
29 a patient model that includes covariate data (the context). The system collaborates with clinicians and  
30 people with stroke to customize the recommended plan based on clinical judgment, constraints, and  
31 preferences. To achieve this goal, we propose a *Contextual Markov Decision Process (CMDP)* framework and  
32 a novel hierarchical Bayesian model-based RL algorithm, named *Posterior Sampling for Contextual RL*  
33 (PSCRL), that discovers and continuously adjusts near-optimal sequential treatments by efficiently  
34 balancing exploitation and exploration while respecting constraints and preferences.

35 **Results.** We implemented and validated our precision rehabilitation system in simulations with a  
36 sequence of 100 diverse, synthetic patients. Simulation results showed the system ability to continuously  
37 learn from both upcoming data from the current patient and a database of past patients via Bayesian  
38 hierarchical modeling. Specifically, the algorithm’s sequential treatment recommendations became  
39 increasingly more effective in improving functional gains for each patient over time and across the  
40 synthetic patient population.

41 **Conclusions.** Our novel AI-based precision rehabilitation system based on contextual model-based  
42 reinforcement learning has the potential to play a key role in novel learning health systems in  
43 rehabilitation.

44

45 **Keywords:** Stroke. Neurorehabilitation. Precision rehabilitation. Reinforcement learning. Patient model.  
46 Digital twin. Bayesian modeling.

47

## 48 **Background**

49 Despite extensive rehabilitation research, including multiple multi-site randomized clinical trials, about  
50 40% of the 800,000 people who suffer a stroke in the US each year show limited recovery of upper  
51 extremity (UE) function, restricting daily activities and the quality of life(1-3). The challenge of  
52 determining optimal rehabilitation based on an individual's clinical profile is one of the most challenging  
53 questions in stroke rehabilitation(4). Precision rehabilitation, defined as the “right intervention, at the  
54 right time, in the right setting, for the right person,” (5, 6) has been proposed as a solution to improve UE  
55 function. However, as we review below, delivering true precision rehabilitation, that is, determining the  
56 optimal sequential treatment plan that maximizes long-term outcomes for each patient, is difficult even for  
57 experienced clinicians because of the huge number of potential plans given the multiple scheduling factors  
58 that modulate recovery, the high between-patient variability, and the multiple scheduling constraints.  
59 Here, we therefore propose a collaborative Artificial Intelligence (AI) precision rehabilitation system for  
60 stroke survivors with upper extremity (UE) deficits that uses model-based Reinforcement Learning (RL).  
61 Such model-based RL systems are being deployed in precision medicine, for instance, for cancer and  
62 sepsis treatments (7-10). However, no AI system exists to personalize and continuously refine

63 rehabilitation treatment plans post-stroke. The collaborative AI system iteratively adjusts and  
64 recommends the plan—timing, dosage, intensity—of UE task practice based on the patient’s profile to  
65 enhance long-term outcomes; clinicians and patients can customize the recommended plan based on  
66 clinical judgment, constraints, and preferences. The system’s overall output is a personalized long-term  
67 (e.g. 6-month) treatment plan updated at each clinician-patient session. The system is self-improving both  
68 at the patient and population level: as the model is updated from a growing database, the treatment  
69 recommendations become increasingly effective in improving functional gains for each patient over the  
70 treatment horizon (i.e., duration) and across the patient population.

## 71 **Organization**

72 This paper is organized as follows: First, we review prior research demonstrating that optimizing the  
73 longitudinal rehabilitation plan is essential for achieving the best outcomes post-stroke. However, given  
74 the multiple scheduling factors that modulate recovery, the high between-patient variability, and the  
75 multiple scheduling constraints, we argue that clinician expertise alone is insufficient to determine  
76 optimal rehabilitation plans for each patient. Second, we propose to address these challenges with a new  
77 framework for collaborative AI precision rehabilitation based on contextual model-based RL, where the  
78 context is the set of individual factors that modulate recovery. Third, given the uncertainty in the patient  
79 model, context, and scheduling constraints, we propose a novel algorithm for precision rehabilitation,  
80 *Posterior Sampling for Contextual Reinforcement Learning* (PSCRL), which generates increasingly better  
81 personalized treatment plans as the database grows. Fourth, to illustrate the functioning of the algorithm,  
82 we propose a realistic scenario of precision rehabilitation for dose scheduling. Fifth, we present  
83 simulation results to illustrate how the treatment plan continuously improves via both within-patient and  
84 between-patient learning. Finally, we discuss related work, limitations, and future clinical implementation.

## 85 **The challenges of determining the treatment plan in precision rehabilitation**

86 We limit our AI-based precision rehabilitation system to the scheduling of UE motor rehabilitation post-  
87 stroke, which is sequential and delivered over months. Such a system assumes that optimizing the  
88 individual rehabilitation plan matters. We review four types of challenges. First, stroke recovery depends  
89 on time-varying (dynamical) processes operating at different time scales modulated by treatment  
90 parameters. Second, the effects of treatment depend on multiple individual factors, which we collectively  
91 call the “context,” that need to be considered for personalizing the rehabilitation plan. Third, not all  
92 treatments are possible; instead, they are constrained by clinical constraints, logistic constraints, and  
93 personal preferences, which we collectively call “constraints.” Finally, given the sequential nature of  
94 rehabilitation over extended periods, the number of rehabilitation plans is very large. Thus, determining  
95 the plan that maximizes long-term outcomes, given the scheduling parameters, the individual differences,  
96 and the constraints, can be best achieved by an AI system in collaboration with the clinician.

### 97 *The dynamical processes of recovery post-stroke are modulated by treatment parameters*

98 Stroke recovery operates via multiple time-dependent processes. The initial changes in sensorimotor  
99 behavior largely result from “spontaneous recovery”, which involves the reduction in edema, ischemic  
100 penumbra, and brain re-organization(11, 12), and is the greatest in the first month but continues for up to  
101 6 months(13, 14). Then, motor practice can further improve sensorimotor behavior via neural plasticity  
102 mechanisms(15). However, practice affects recovery in a complex manner, with the following treatment  
103 parameters influencing the effectiveness of practice post-stroke. 1) The dose of rehabilitation, whereby  
104 high doses consisting of 1000s of trials delivered over days of practice, leads to structural and stable  
105 changes in brain areas involved in recovery(15) and to greater functional improvements(16-20). 2) The  
106 intensity of practice, whereby high daily doses enhance synaptic plasticity(15) that facilitates recovery(21,

107 22). 3) The timing of rehabilitation is important as motor practice that is too early or too late has been  
108 associated with worse outcomes(23, 24),(12, 25), indicating a critical “window of plasticity” (11, 12, 16, 17,  
109 23-26), which is about 30 to 90 days for UE function in humans(27). In addition, intensive initial practice  
110 increases the probability of habit formation of motor training and, thus, long-term perseverance(28). 4)  
111 The distribution of practice is often needed (29) because a lack of sustained practice results in decreased  
112 activity in relevant motor areas(15) and loss of the gains due to rehabilitation (30). In addition, distributed  
113 practice enhances long-term performance compared to massed practice in motor learning in healthy(31)  
114 and stroke(32) populations. 5) Finally, the amount of UE use in daily activities, if above a threshold, can  
115 act as “self-training” (33-35), increasing future use and function(36, 37).

116 This prior research, therefore, shows that to maximize long-term outcomes, the rehabilitation plan needed  
117 to optimize recovery cannot be uniform or follow some simple predefined schedule but instead needs to  
118 be carefully crafted throughout rehabilitation in terms of dosage, intensity, timing, and distribution over  
119 time to maximize long-term gains.

### 120 *The context associated with the variability of response to treatment*

121 Stroke is characterized by large variability in lesions, impairments, and response to recovery(38, 39).  
122 Individuals post-stroke show highly variable responses, even to the same treatment. For instance, in re-  
123 analyses of the EXCITE(24) and DOSE(20) trials data, we found that about one-fourth of participants  
124 continued to see improvements following rehabilitation, and another one-fourth lost most gains(35, 40).  
125 The following characteristics have been shown to modulate the effect of rehabilitation: 1) lacunar and non-  
126 lacunar strokes(41); 2) baseline clinical scores(29, 42); 3) the side of lesion(43); 4) the integrity of the  
127 ipsilesional corticospinal tracts(41, 44-47); 5) somatosensory deficits(48-51) and 6) deficits in the integrity  
128 of visuospatial working memory(52), which we showed modulates the effect of massed but not distributed

129 practice in chronic stroke(32).<sup>a</sup> Therefore, the treatment plan needs to be individualized to account for the  
130 individual level clinical factors that are known to modulate the effect of treatment.

### 131 *The constraints on possible treatments plans*

132 Because clinical and logistic constraints as well as patient preferences limit the plans that can be delivered,  
133 not all treatment plans are possible. Clinical constraints include high activity-dependent fatigability(57),  
134 reduced attention soon after stroke, limited UE function before sufficient spontaneous recovery, and other  
135 medical conditions (e.g., shoulder pain, depression). Logistic constraints include patient schedule changes  
136 (e.g., vacations), socioeconomic and interpersonal needs, and reimbursement needs. Finally, patient  
137 preferences in scheduling and task practice are important to maximize motivation and even gains in  
138 rehabilitation. For instance, providing choices of task practice has been shown to increase gains in motor  
139 learning and rehabilitation<sup>57</sup> and increase engagement and adherence(58, 59). Thus, the treatment plan  
140 must consider scheduling constraints, which we classify into clinical constraints, logistical constraints, and  
141 patient preferences.

### 142 *The current limitations in optimizing the treatment plan*

143 The current state-of-the-art in scheduling of task-oriented motor therapy to maximize recovery is based on  
144 the clinician's knowledge and experience. Via both formal and continuing education, clinicians learn what  
145 treatment plan "works" best for sub-types of patients. As they treat patients and observe progress,

<sup>a</sup> Other neural factors include such as transcallosal tract integrity, ipsilesional motor cortex activity, and connectivity between motor and premotor cortex (41, 45, 53-56). However, we note that identifying these factors requires TMS, EEG, or research-grade MRIs, which are often unavailable in routine care.

146 clinicians gradually build a mental model of effective treatment plans for different sub-types of patients.  
147 However, as reviewed above, the nuances of the effect of scheduling parameters on recovery at different  
148 times post-stroke, the considerable between-patient variability, and all possible constraints make it hard to  
149 predict how patients will respond to different treatment plans and then nearly impossible to select the  
150 most effective treatment plans. Indeed, the number of potential treatment plans is huge. For instance,  
151 even the seemingly simple task of deciding whether to treat or not each week for 6 months results in ~67  
152 million treatment plans. Thus, it is currently not feasible to determine the treatment plan that will  
153 maximize recovery for each patient. Here, we propose that a collaborative AI-based system can help the  
154 clinician-patient team determine effective treatment plans.

## 155 **Methods**

### 156 **Addressing the challenges of precision rehabilitation with Contextual Model-** 157 **based Reinforcement Learning**

#### 158 *Precision rehabilitation as an RL problem in a Markov Decision Process (MDP)*

159 Although ad-hoc rehabilitation plans can be determined, we propose a structured theoretical framework  
160 for optimizing rehabilitation treatments using Reinforcement Learning (RL). Precision rehabilitation can  
161 be viewed as a decision-making problem in which the clinician-AI team interact with a person with stroke  
162 sequentially with the goal of determining treatment plans that maximize sensorimotor outcomes. The  
163 quality of treatments can be measured by longitudinal rehabilitation outcomes, which are stochastic and  
164 partly controllable, i.e., the outcomes are influenced but not fully determined by the treatment.



165 An appropriate and well-studied framework for such a decision-making problem is the Markov Decision  
166 Process (MDP) in the RL literature(60, 61). An MDP consists of four primary components ( $\mathcal{S}, \mathcal{A}, \mathbb{T}, R$ ),  
167 where  $\mathcal{S}$  is a set of states,  $\mathcal{A}$  is a set of actions (i.e., treatments),  $\mathbb{T}$  is a (hidden) transition function such that  
168  $\mathbb{T}(s'|s, a)$  gives the probability of transitioning from state  $s \in \mathcal{S}$  to state  $s' \in \mathcal{S}$  given action  $a \in \mathcal{A}$ , and  
169 reward function  $R$  is such that  $R(s, a, s')$  is the reward received when action  $a$  is performed in state  $s$  and  
170 leads to a transition into state  $s'$ . In the rehabilitation case, the states are motor “memories” on which the  
171 outcomes will depend, the actions refer to the dose and type of rehabilitation at a given timestep, the  
172 transition function is equivalent to the patient (dynamics) model that describes the person’s response to  
173 treatment, and the reward function generates the reward (i.e., a positive reinforcement signal) given to the  
174 agent that quantifies the goodness of the chosen treatment at each timestep.

175 As a branch of AI, RL aims to design an *agent* (i.e., an autonomous decision-maker) that can learn to act  
176 optimally in an unknown “environment” commonly modeled by an MDP. The optimal actions maximize  
177 the instantaneous and total future rewards (in expectation). For precision rehabilitation, the goal of an RL  
178 agent is to learn an individualized, reward-maximizing treatment *policy* (i.e., a protocol for selecting  
179 treatments contingent on the patient’s clinical state), where the reward function is customized by the  
180 clinician and the patient based on the desired long-term outcomes. The learning process in an MDP is  
181 interactive: the agent tries different treatments, the patient generates a reward signal, and the agent  
182 adjusts its strategy intelligently to make sure that better treatments are more likely to be selected.

183 To address the specific challenges of precision rehabilitation post-stroke outlined in Background, we  
184 propose a novel AI-agent based on contextual model-based RL with four key elements. The RL agent1)  
185 utilizes an interpretable, dynamical, Bayesian patient model that takes into account the time-varying  
186 (dynamical) processes of stroke recovery at different time scales modulated by treatment decisions (item

187 ① in Figure 1), 2) performs patient model update via contextual and hierarchical modeling (item ② in  
188 Figure 1), 3) takes into account constraints and personal preferences (item ③ in Figure 1), and 4) plans a  
189 sequential treatment with respect to the context, constraints, and uncertainties in the patient model (item  
190 ④ in Figure 1). Each component is described in the next four sections.

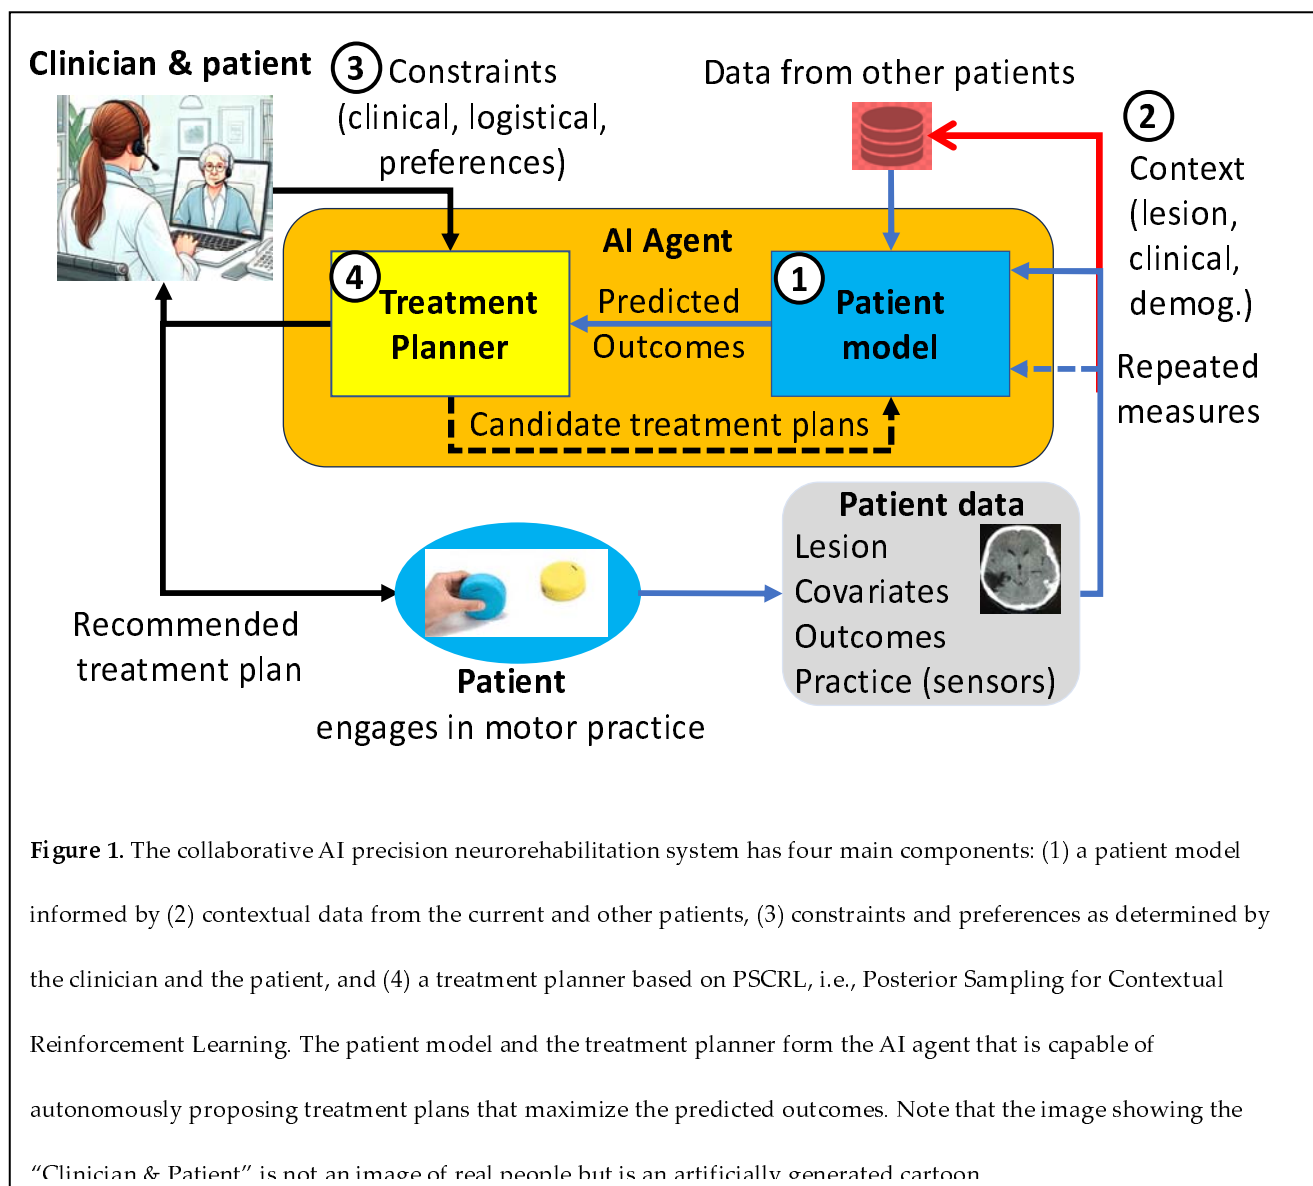

**Figure 1.** The collaborative AI precision neurorehabilitation system has four main components: (1) a patient model informed by (2) contextual data from the current and other patients, (3) constraints and preferences as determined by the clinician and the patient, and (4) a treatment planner based on PSCRL, i.e., Posterior Sampling for Contextual Reinforcement Learning. The patient model and the treatment planner form the AI agent that is capable of autonomously proposing treatment plans that maximize the predicted outcomes. Note that the image showing the  
191 “Clinician & Patient” is not an image of real people but is an artificially generated cartoon

192 *Interpretable, dynamical, Bayesian patient model for precision rehabilitation*

193 Feasible implementation of RL for precision rehabilitation requires a patient model that forecasts (“predict  
194 some future condition as a result of study and analysis of available pertinent data”(62)) functional

195 outcomes accurately and precisely during the subacute to chronic phases, given the current state and  
196 action. Unlike in *model-free* RL, in which a control policy is directly learned via slow trial and error, in  
197 *model-based* RL, the system learns a model of the environment (i.e., transition probabilities and reward  
198 functions) via (efficient) supervised learning and then solves the MDP using this learned model. Because  
199 model-based RL requires fewer interactions with patients to identify good policies, model-based RL is  
200 preferred in medical applications (7-10, 63). (For instance, there could be as little as one interaction  
201 between the AI system and the patient every two weeks, whereas 10,000s of interactions would be needed  
202 in a model-free approach).

203 A second significant advantage of model-based RL is the possibility of interpretability of the decision-  
204 making process. Although “black box” models, such as recurrent neural networks, could be used for  
205 patient modeling, mechanistic, interpretable, “grey box” models (i.e., with a structure that is motivated by  
206 theory and the parameters estimated from patient data) can be developed to explicitly account for the  
207 time-varying processes of stroke recovery, where the dosage, intensity, and timing of practice modulate  
208 recovery (see Background section). For instance, in previous work (29), we used state-space modeling to  
209 forecast UE functional outcomes for chronic stroke that included a) the intensity of practice (e.g., the daily  
210 dose, constrained by the total dose) as input to account for gain in function due to motor training, b) a  
211 “forgetting” term to account for the need of distributed practice, and c) a non-linear “self-training” term to  
212 account for the dose of UE use in daily activities. Analysis of the parameters in such interpretable models  
213 can help the clinician make informed decisions about therapy. For instance, in our previous model, if the  
214 estimated forgetting rate is high, more frequent “booster” sessions need to be scheduled. An updated  
215 model for all phases of stroke recovery, from acute to chronic, would include a critical window that  
216 modulates training effectiveness as a function of time since stroke and a spontaneous recovery term.

217 Finally, because the RL agent must select treatment plans that account for the uncertainty of recovery post-  
218 stroke, the patient model needs to quantify uncertainty in long-term predictions, e.g., by providing  
219 credible intervals for future outcome assessments given a treatment plan. Bayesian modeling provides a  
220 principled framework for uncertainty quantification and for incorporating prior knowledge (when  
221 available, e.g., from similar patients in a database) to reduce such uncertainties in the predictions.

### 222 *Contextual and hierarchical modeling to leverage data from other patients*

223 Because post-stroke response to treatment largely depends on individual characteristics (see Background),  
224 the RL agent must find individualized treatment policies. In a typical model-based RL application, such as  
225 robot control, the model is typically well-identified and identical across all instances of the controlled  
226 system (e.g., the robots). In contrast, humans show large inter-individual variations, which are further  
227 magnified by the variability of the stroke. Therefore, we propose a Contextual MDP(64) (CMDP)  
228 framework for precision rehabilitation. CMDP can be seen as a collection of (individual level) MDPs  
229 connected by contexts (lesion, etc.; Item ②-Context in Figure 1). The context is an arbitrary set of  
230 measured covariates (e.g., type of stroke, see above) that partially explains individual differences in  
231 outcomes. CMDP assumes context-dependent dynamics (i.e., the patient's outcomes trajectory partially  
232 depends on the context) and is thus suitable for modeling multi-patient, heterogenous rehabilitation  
233 data(65). For instance, the context can be included in the hierarchical patient model by linearly (or non-  
234 linearly) influencing the gains due to motor training.

235 A difficulty in forecasting neurorehabilitation outcomes, however, is that for a new patient, there is  
236 initially no (or little) data to estimate the effect of motor therapy, and the variance of the predictions may  
237 be large. As in our previous work, we therefore consider a hierarchical Bayesian model to refine the initial  
238 predictions via population level "hyper-parameters" that allows information sharing from past, similar

239 patients (29). Crucially, the hyper-parameters are used to construct informed prior distributions for  
240 individual level parameters when predicting the response of a patient early in therapy. This hierarchical  
241 model is trained with repeated data from sensors and clinical assessments, baseline contextual data from  
242 the current patient and an expanding patient database (see Figure 1).

### 243 *Treatment constraints and preferences limit the range of possible treatments*

244 Treatment plans must take into account clinical and logistical constraints as well as personal scheduling  
245 preferences (Item ③ in Figure 1). Thus, we consider finding an optimal constrained treatment policy in a  
246 CMDP with respect to, for instance, realistic constraints such as a long-term rehabilitation budget (i.e., the  
247 total dose that can be administered throughout the longitudinal treatment), a stepwise dose limit (e.g., at  
248 most two therapy sessions per week). This leads to a novel constrained RL problem in a CMDP with  
249 unknown individualized dynamics. Most constraints and preferences (e.g., a dose limit per week and  
250 scheduling restrictions due to time conflict) can be handled through a time-varying action set, which  
251 reduces the search space for an optimal treatment plan. However, special care is required for an RL  
252 algorithm to strictly adhere to the long-term constraints (e.g., the total dose). In this work, we propose a  
253 budgeted dynamic programming method that plans according to both the patient's state and the  
254 remaining budget to solve the long-term planning problem.

255 Via the collaborative nature of our AI system (see Figure 1), the clinician and patient can input “hard”  
256 constraints, such as the minimum or maximum daily distal and proximal arm practice doses every two  
257 weeks, and, if needed, “soft” constraints, such as the weights of the reward function. For instance, in  
258 preliminary simulations (see below), the reward is the sum of the outcomes at 6 months plus the mean  
259 outcome until then with equal weighting. This can be adjusted, for instance, for more emphasis on long-  
260 term outcomes or specific treatment goals (i.e., emphasis on distal vs proximal arm functions). After the

261 adjustments, the algorithm will be rerun, and the clinician will be able to visualize the proposed plan and  
262 forecasted outcomes and modify it as desired.

### 263 *A treatment planner that accounts for uncertainty in the patient model, context, and constraints*

264 We consider the RL problem in CMDP, focusing on the uncertainties of the individualized model and the  
265 update of this model. We propose a novel self-improving treatment planner (Item ④, in Figure 1) based on  
266 the Posterior Sampling for Contextual Reinforcement Learning (PSCRL) algorithm for solving the RL  
267 problem in CMDP. PSCRL is a model-based algorithm that tackles the challenges of precision  
268 rehabilitation by combining Bayesian hierarchical modeling and planning under constraints. PSCRL  
269 belongs to a family of algorithms following Thompson sampling (66, 67) (68), which exhibits strong  
270 empirical performance and theoretical guarantees in various RL settings, including recent medical  
271 applications (69-72). Briefly, at each step, PSCRL updates a posterior distribution over individual level  
272 MDPs, takes one sample from this posterior, and optimizes treatment for this specific patient model. This  
273 posterior-sampling behavior tackles the tradeoff between exploration and exploitation. Early in learning,  
274 as the model is uncertain, with wide parameter distributions, rehabilitation plans are varied. Late in  
275 learning, as uncertainty decreases, the plans are closer to optimal. Once a specific model instance is  
276 selected via sampling, we apply a planning algorithm (such as dynamic programming in our simulation  
277 study below). To account for budget constraints, our treatment plans select treatments with respect to both  
278 the current patient state and the remaining budget. In the following, we describe PSCRL in the context of  
279 stroke rehabilitation.

## 280 **Formal description of the RL algorithm for dose scheduling**

281 To illustrate the functioning of our AI-based precision rehabilitation system, we introduce the CMDP  
282 formulation for a simple dose optimization problem of a generic upper extremity treatment with finite

283 dosing options, which represents the hours of rehabilitation therapy with realistic scheduling constraints.  
284 We defer the technical details to Supplementary Material A. We then describe the PSCRL algorithm to  
285 solve this problem.

286 **Notations.** We first define necessary notations for formalizing the sequential dose optimization problem.  
287 For any positive integer  $m$ , we define  $[m] = \{1, 2, \dots, m\}$ . For any two positive integers  $n \leq m$ , we use the  
288 shorthand  $n:m = \{n, n + 1, \dots, m\}$ . We denote an ordered collection of values (or random variables) by  
289 applying this notation in subscript. For instance, we write  $s_{i,1:H} = (s_{i,1}, s_{i,2}, \dots, s_{i,H})$  to denote a sequence of  
290 states for patient  $i \in \mathbb{N}$  until timestep  $H \in \mathbb{N}$ . For  $d$  arbitrary real numbers  $a_1, a_2, \dots, a_d$ , we also use  
291  $a_{1:d} = (a_1, a_2, \dots, a_d)$  to denote a  $d$ -dimensional vector, i.e.,  $a_{1:d} \in \mathbb{R}^d$ .

292 **Description of the Precision Rehabilitation scenario.** We consider a scenario in which a clinician-AI team  
293 treats, in sequence, a cohort of  $N$  patients post-stroke. Each patient receives rehabilitation treatments over  
294 a fixed treatment horizon (e.g., 6 months) containing  $H$  discrete timesteps (e.g., each timestep is two  
295 weeks). Upon patient intake, the clinician-AI team observes a  $d_c$ -dimensional context  $c_i \in \mathbb{R}^{d_c}$  that  
296 encodes  $d_c$  clinical covariates (demographic information, type of stroke, etc.) for the patient indexed by  $i$ .  
297 Then, at time  $t \in [H]$ , a patient's recovery is measured via clinical outcome assessments summarized into  
298 an outcome  $o_{i,t} \in \mathcal{O} \subseteq \mathbb{R}$  (e.g., the Action Research Arm test, ARAT, or the Motor Activity Log, MAL),  
299 where  $\mathcal{O}$  is called an outcome space; for instance,  $\mathcal{O} = [0, 5]$  for the MAL. We assume that the outcome  $o_{i,t}$   
300 depends on a latent state  $s_{i,t} \in \mathcal{S} \subseteq \mathbb{R}$  that summarizes the patient's motor state (or "memory") at time  $t$ .  
301 We consider scalar outcome and treatment for ease of demonstration. We discuss vector-valued outcomes  
302 and treatments (e.g., a 2-dimensional dose that specifies distal and proximal practice separately) in  
303 **Discussion: Future Work.**

304 For each patient  $i$  and each timestep  $t$ , the collaborative AI system recommends a treatment  $a_{i,t}$ , which  
305 represent, for instance, the hours of rehabilitation therapy in this simple dose optimization example. The  
306 treatment influences the motor state and in turn the outcome in future timesteps. To reflect realistic time  
307 and monetary constraints, we also impose a total budget of  $\bar{B}$  therapy hours to be distributed over  $H$   
308 timesteps (i.e.,  $\sum_{t=1}^H a_{i,t} \leq \bar{B}$ ) and a step-wise limit  $\bar{b}$  that represents the maximum rehabilitation dose that  
309 can be administered at a timestep (i.e.,  $a_{i,t} \leq \bar{b}$ ). These constraints can be modified by the clinicians or the  
310 patients at any time.

311 **Data generating process of multi-patient rehabilitation data.** We compactly denote the data collected  
312 after treating patient  $i$  by a *context-trajectory pair*  $(c_i, \tau_i)$ , where  $\tau_i = (o_{i,1:H+1}, a_{i,1:H})$  is a *trajectory* containing  
313 the history of outcomes and treatments throughout the  $H$ -step treatment horizon, with an additional post-  
314 treatment outcome  $o_{i,H+1}$ . In general, we assume that the outcome  $o_{i,t}$  only partially reveals the patient's  
315 latent state  $s_{i,t}$  (e.g., motor memory) and is a random variable that is conditionally independent of all  
316 other variables given  $s_{i,t}$ . We represent this dependency by an observation function  $\mathbb{O}(o|s)$ , which gives  
317 the probability of observing outcome  $o$  when the current patient-state is  $s$ . Here, the observation function  
318  $\mathbb{O}$  is stochastic to reflect random measurement errors of clinical assessments. We write  $o_{i,t} \sim \mathbb{O}(\cdot | s_{i,t})$  to  
319 denote that the conditional distribution of  $o_{i,t}$  is  $\mathbb{O}(\cdot | s_{i,t})$ . We further assume that for each patient  $i$ , states  
320  $s_{i,1:H+1}$  and treatments  $a_{i,1:H}$  follow a first-order dynamics model parametrized by an unknown patient-  
321 specific  $d_\theta$ -dimensional vector  $\theta_i \in \mathbb{R}^{d_\theta}$ . Specifically, for each  $t \in [H]$ , given the current state  $s_{i,t}$  and  
322 treatment  $a_{i,t}$ , the next state  $s_{i,t+1}$  follows a conditional distribution  $\mathbb{T}_{\theta_i}(\cdot | s_t, a_t)$ , i.e.,  $s_{i,t+1} \sim \mathbb{T}_{\theta_i}(\cdot | s_t, a_t)$ .

323 In addition, the context vector  $c_i$  observed at intake can be used to infer the unknown parameter vector  $\theta_i$   
324 that characterizes the transition dynamics. Components of  $c_i$  are covariates that potentially encode  
325 similarity between patients (see Background section) and can be used to inform clinical decision-making



326 when little to no outcome data is available for a new patient  $i$ . We assume that the exact relationship  
327 between contexts and recovery dynamics is unknown to the clinician-AI team and needs to be inferred  
328 from data. A reward signal is defined based on observed data.

329 In summary, the interactions between the clinician-AI team and the patients can then be described with  
330 the following:

- 331 1. For patient  $i = 1, 2, \dots, n$ :
- 332 2. Conduct baseline measurements on patient  $i$  to observe context  $c_i \in \mathbb{R}^{d_c}$
- 333 3. At timestep  $t = 1, 2, \dots, H$ :
- 334 4. Observe patient outcome  $o_{i,t} \sim \mathbb{O}(\cdot | s_{i,t})$  and remaining budget  $b_{i,t}$
- 335 5. Clinician-AI team decides and recommends dose  $a_{i,t} \in [\bar{b}]$  subject to constraint  $a_{i,t} \leq b_{i,t}$  and  
336 user-defined rewards, using data from past patients  $(c_{1:i-1}, \tau_{1:i-1})$  and from the current patient  
337  $(c_i, o_{i,1:t}, a_{i,1:t-1})$
- 338 6. With treatment  $a_{i,t}$ , patient undergoes transition in (latent) state,  
339  $s_{i,t+1} \sim \mathbb{T}_{\theta_i}(\cdot | s_{i,t}, a_{i,t})$ ; budget updates to  $b_{i,t+1} = b_{i,t} - a_{i,t}$
- 340 7. At timestep  $H + 1$ , the patient returns to the clinic for post-treatment measurements, leading to  
341 terminal outcome  $o_{i,H+1}$ .

342  
343 Unlike an MDP, this scenario assumes that the patient-state  $s_{i,t}$  (e.g., motor memory) is hidden from the  
344 clinician-AI team and the outcomes are generated by an observation function  $\mathbb{O}$ . In theory, this  
345 environment is called a Partially Observable MDP (POMDP), which is computationally intractable in  
346 general. In practice, RL in POMDP can be approximately solved by expanding the state with  
347 measurements from multiple timesteps (see Discussion). For simplicity, in the rest of the paper, we  
348 consider the MDP case with fully observed states and the trajectory for a patient becomes

349  $\tau_i = (s_{i,1}, a_{i,1}, \dots, s_{i,H}, a_{i,H}, s_{i,H+1})$ .

350 *Algorithm: Posterior Sampling for Contextual Reinforcement Learning (PSCRL)*

351 Here, we briefly describe the PSCRL algorithm (Algorithm 1).<sup>b</sup> At time  $t$  for patient  $i$ , PSCRL first updates  
352 the posterior distribution of parameters  $\theta_i \in \mathbb{R}^{d_\theta}$  of the patient model given all available data. As a  
353 shorthand, we denote the posterior density of  $\theta_i$  by

$$v_{i,t}(\theta_i) = \mathbb{P}_{v_0}(\theta_i | c_{1:i}, \tau_{1:i-1}, s_{i,1:t}, a_{i,1:t-1})$$

354 where  $v_0$  is a prior distribution over all unknown variables and  $\mathbb{P}_{v_0}$  indicates that the posterior  
355 distribution depends on the prior  $v_0$ . Then, a plausible parameter vector  $\tilde{\theta}_{i,t}$  is randomly drawn from this  
356 posterior distribution over the model parameters for the current patient. Next, an integer-valued dose  
357  $a_{i,t} \in \mathcal{A} = [0: \bar{b}]$  subject to user-specified constraints is determined by an optimal control algorithm (such  
358 as dynamic programming used in the simulation study below) on the sampled dynamics model.  
359 Specifically, PSCRL computes a time-dependent optimal treatment policy  $\pi_{t:H}^{\tilde{\theta}_{i,t}}$  for the remaining timesteps  
360 such that  $\pi_{t:H}^{\tilde{\theta}_{i,t}}$  maximizes the expected predicted future rewards, i.e.,

$$\pi_{t:H}^{\tilde{\theta}_{i,t}} \in \operatorname{argmax}_{\pi_{t:H}} \mathbb{E}_{\pi_{t:H}}^{\tilde{\theta}_{i,t}} \left[ \sum_{h=t}^H R_h(s_h, a_h, s_{h+1}) \right]$$

361 where  $\mathbb{E}_{\pi_{t:H}}^{\tilde{\theta}_{i,t}}$  indicates that the expectation is taken over the distribution of future states and actions under  
362 policy  $\pi_{t:H}$  (i.e.,  $a_h = \pi_h(s_h)$  for  $h = t, t + 1, \dots, H$ ) and the sampled dynamics parameter  $\tilde{\theta}_{i,t}$ , and  $R_{t:H}$  is the  
363 user-defined, time-varying reward function (which may be modified at will, e.g., to reflect the desired  
364 long-term rehabilitation outcomes by the clinician-patient team). According to this (updated) policy, the

<sup>b</sup> We defer the technical details of PSCRL and a review of the related theoretical literature to Supplementary Material A.

365 recommended treatment at timestep  $t$  by PSCRL is  $a_{i,t}$ . As new outcome data is observed in  
366 the next timestep, the posterior distribution is updated, leading to more accurate (sampled) patient  
367 models, better treatments, and better outcomes.

---

**Algorithm 1** Posterior Sampling for Contextual RL (PSCRL)

---

- 1: **Input:** Prior distribution  $\nu_0$
- 2: **for**  $i = 1, \dots, N$  **do**
- 3:   Observe patient context  $c_i$
- 4:   **for**  $t = 1, \dots, H$  **do**
- 5:     Observe current patient-state  $s_{i,t}$
- 6:     Update the posterior distribution of  $\theta_i$  given all past data via Bayesian hierarchical modeling:

$$\nu_{i,t}(\theta_i) \leftarrow \mathbb{P}_{\nu_0}(\theta_i | c_{1:i}, \tau_{1:i-1}, s_{i,1:h}, a_{i,1:h-1})$$

- 7:   Sample patient dynamics parameter:  
$$\tilde{\theta}_{i,t} \sim \nu_{i,t}(\theta_i)$$
- 8:   Find optimal policy  $\pi_{t:H}^{\tilde{\theta}_{i,t}}$  for parameter  $\tilde{\theta}_{i,t}$  *subject to any user-specified constraints*
- 9:   Apply treatment  $\pi_t^{\tilde{\theta}_{i,t}}(s_{i,t})$
- 10: **end for**
- 11:   Observe post-treatment state  $s_{i,H+1}$  and record trajectory

$$\tau_i \leftarrow (s_{i,1:H+1}, a_{i,1:H})$$

- 12: **end for**
- 

368

## 369 **Simulation study: adaptive dose scheduling in chronic stroke**

370 We tested our new PSCRL algorithm in simulations using a chronic stroke model. In previous work(29),  
371 we developed and validated a chronic model based on DOSE and EXCITE clinical trials (20, 73), which  
372 provided compelling evidence that the dose and scheduling of therapy affect rehabilitation outcomes for  
373 patients with chronic stroke. As a testbed for the proposed framework, we developed a simulator based on  
374 our previous dynamics model for the change in the Motor Activity Log (MAL) (29), a functional UE

375 measure with slight modifications to include a patient context (see below). We simulated  $N = 100$  patients  
376 arriving in sequence to receive rehabilitation therapy over a 6-month treatment window. The treatment  
377 horizon was divided into  $H = 12$  timesteps, where each timestep corresponds to a 2-week interval. At each  
378 timestep, a patient may receive a dose of 0–20 hours of rehabilitation therapy, with a maximum total dose  
379 of 60 hours, corresponding to the maximal dose and the maximal weekly dose, respectively, in the DOSE  
380 trial(20). Large between-patient variability was modeled by including four baseline covariates.

### 381 *Specifications of the patient simulator*

382 **Patient dynamics model.** Henceforth we use superscript “ $\star$ ” to denote a ground-truth parameter used by  
383 the simulator but hidden from the decision-maker. Following our previous work(29), our simulation  
384 utilizes a patient dynamics model (or patient model, for short) that describes the change in the MAL  
385  $o_{i,t} \in [0,5]$  (see Table 1). Formally, the dynamics model contains a subject-independent (stochastic)  
386 observation function  $\mathbb{O}(o_{i,t}|x_{i,t})$  that gives the conditional probability of  $o_{i,t}$  given “motor memory”  
387  $x_{i,t} \in \mathbb{R}$ . The motor memory is updated by an individualized transition function  $\mathbb{T}'_{\theta_i^\star}$ .<sup>c</sup> Up to some process  
388 noise, the next motor memory  $x_{i,t+1}$  is a function of the current memory  $x_i^t$  modulated by the retention  
389 rate  $\alpha_i^\star \in [0,1]$ , the dose of training  $a_{i,t}$  modulated by the learning rate  $\beta_i^\star \geq 0$ , and the current MAL  $o_{i,t}$   
390 modulated by the self-training rate  $\gamma_i^\star \geq 0$ . We represent individual level parameters using a vector  
391  $\theta_i^\star = (\alpha_i^\star, \beta_i^\star, \gamma_i^\star) \in \mathbb{R}^3$ . Additionally, the individualized dynamics depend on population level parameters,  
392 including a process noise scale  $\sigma_x^\star \geq 0$ , slope-and-offset parameters  $(\kappa_{\text{slope}}, \kappa_{\text{offset}})$  for the observation

<sup>c</sup> We reserve  $s_{i,t}$  and  $\mathbb{T}_{\theta_i^\star}$  for the state and transition function of an augmented MDP used by the RL agent for treatment planning. This is because the agent’s “perceived” state  $s_{i,t}$  may carry more information (e.g., the remaining budget).

393 function that converts motor memory into an MAL measurement (potentially with an observation error  
 394  $\epsilon_{i,t}$ ), and a random effect scale  $\sigma_\beta^* \geq 0$  on learning rate. We update the previous model to reflect the large  
 395 between-patient variability seen in stroke recovery, by assuming that the patient's context vector  $c_i \in \mathbb{R}^d$   
 396 influences  $\theta_i^*$  linearly via a weight matrix  $W^* = (w_\alpha^*, w_\beta^*, w_\gamma^*)^T \in \mathbb{R}^{(d_c+1) \times 3}$ , where  $w_\alpha^*$ ,  $w_\beta^*$ , and  $w_\gamma^*$  contain  
 397 fixed intercepts (at first coordinate) and fixed effects. For simplicity, we only added random effect for  
 398 learning rates ( $\beta_i^*$ ).

| Individual level parameters         | Generating distributions/equations                                                                                          |
|-------------------------------------|-----------------------------------------------------------------------------------------------------------------------------|
| Retention rate                      | $\alpha_i^* = (w_\alpha^*)^T c_i'$ (deterministic)                                                                          |
| Learning rate                       | $\beta_i^* \sim \text{Normal}_{[0,\infty)} \left( (w_\beta^*)^T c_i', (\sigma_\beta^*)^2 \right)$                           |
| Self-training rate                  | $\gamma_i^* = (w_\gamma^*)^T c_i'$ (deterministic)                                                                          |
| States and observations             | Transition dynamics                                                                                                         |
| Motor memory at timestep $t \geq 2$ | $x_{i,t} \sim \text{Normal}(\alpha_i^* x_{i,t-1} + \beta_i^* a_{i,t-1} + \gamma_i^* o_{i,t-1}, (\sigma_x^*)^2)$             |
| MAL at timestep $t \geq 1$          | $o_{i,t} = \text{MAL}_{\max} \cdot \text{Sigmoid}(\kappa_{\text{slope}} x_{i,t} + \kappa_{\text{offset}} + \epsilon_{i,t})$ |

399 Table 1. Simulation of the change in the Motor-Activity-Log (MAL) for synthetic patient in the simulation. The MAL  
 400 ranges from 0 to  $\text{MAL}_{\max} = 5$ . We let  $c_i' = (1, c_i)$  where  $c_i$  is the context vector for patient  $i$ . We assume no observation  
 401 noise, i.e.,  $\epsilon_{i,t} = 0$ . The initial MAL  $o_{i,1} \in [0,5]$  was generated according to  $\text{Normal}_{[0,5]}(\mu = 2, \sigma^2 = 0.04)$ , i.e., a  
 402 truncated normal distribution on the interval  $[0, 5]$ . The initial motor memory  $x_{i,1} \in \mathbb{R}$  is obtained by the inverse of  
 403 the (deterministic) observation function.

404 **Reward definition.** To find a balance between the patient's UE function during the treatment as well as  
 405 the overall rehabilitation function measured post-treatment, we defined the *return* (i.e., total reward) for  
 406 treating a patient to be the sum of the terminal MAL at 6 months ( $o_{i,H+1}$ ) and the mean MAL ( $\sum_{t=1}^H o_{i,t+1} /$   
 407  $H$ ) after the first treatment session. Hence, we defined the (time-varying) reward function at each step by:

$$R_t(s_{i,t}, a_{i,t}, s_{i,t+1}) = \begin{cases} -\infty, & \text{if } a_{i,t} > b_{i,t} \\ o_{i,t+1}/H, & \text{else if } 1 \leq t \leq H - 1 \\ o_{i,H+1}/(H + 1), & \text{else if } t = H \end{cases}$$

408 where  $s_{i,t} = (o_{i,t}, b_{i,t})$  is an expanded state for the CMDP, and we use a penalty of  $-\infty$  to encode the  
409 constraint that each dose  $a_{i,t}$  may not exceed the remaining budget  $b_{i,t}$  at the current timestep.

410 **Simulation hyper-parameters.** We consider  $N = 100$  patients who arrive in sequence to receive  
411 rehabilitation treatment over  $H = 12$  timesteps. A synthetic patient is indexed by  $i \in [N]$  and represented  
412 by a four-dimensional context vector  $c_i \in \mathbb{R}^4$  along with an unknown (ground-truth) parameter vector  
413  $\theta_i^* \in \mathbb{R}^3$ . The patient contexts were drawn independently from a population distribution (specified in  
414 Supplementary Material B) with two continuous covariates (that could represent baseline function,  
415 sensory integrity, etc.) and two categorical covariates (that could represent stroke type, side affected, etc.).  
416 Dynamics parameters  $\{\theta_i\}_{i \in [N]}$  were then randomly generated by a conditional distribution given the  
417 contexts as shown in Table 1 with an unknown random effect scale  $\sigma_\beta^* = 0.2$  for learning rates. Other  
418 (hidden) hyper-parameters  $w_\alpha^*$ ,  $w_\beta^*$ , and  $w_\gamma^*$  for linear context-to-dynamics relationship are specified in  
419 Supplementary Material B. For simplicity, we assumed that the observation function  $\mathbb{O}$  is deterministic  
420 (i.e.,  $\epsilon_{i,t} = 0$ ) and known by the decision-maker with parameters  $\kappa_{\text{slope}} = 0.2$  and  $\kappa_{\text{offset}} = -3$ . As a result,  
421 the simulator matches the assumptions of CMDP and avoids intractability issues (see POMDP in  
422 discussion). See additional details in Supplementary Material B.

### 423 *Implementation details of the PSCRL algorithm*

424 Implementing PSCRL requires specifying a hierarchical Bayesian model and a planning algorithm that  
425 finds the optimal policy given a sampled patient model.

426 **Patient model update via posterior inference.** We make the simplifying assumption that the structure of  
427 the hierarchical MAL model described above is known except for the ground-truth parameters. PSCRL

428 uses a hierarchical Bayesian modeling approach, treating all unknown quantities as random variables. For  
 429 clarity, consider the parameters with superscript “ $\star$ ” (e.g.,  $\theta_i^\star$ ) as fixed unknown quantities, while those  
 430 without superscript (e.g.  $\theta_i$ ) as random variables. The hierarchical Bayesian model is defined by hyper-  
 431 prior distributions for population level random variables (or vectors) ( $w_\alpha, w_\beta, w_\gamma, \sigma_\beta, \sigma_x$ ), prior  
 432 distributions for individual level variables  $\theta_i = (\alpha_i, \beta_i, \gamma_i)$  conditioned on the population-level parameters  
 433 and a likelihood function for the observed data ( $o_{i,t}$ ’s along with  $a_{i,t}$ ’s). **Table 2** shows the prior and hyper-  
 434 prior distributions used by PSCRL in the simulation experiment. The likelihood function is given by the  
 435 transition function as in **Table 1**. Since exact posterior inference is computationally intractable, we used  
 436 Hamiltonian Monte Carlo (HMC)(74), a state-of-the-art Markov Chain Monte-Carlo (MCMC) algorithm  
 437 (implemented in NumPyro (75)), to approximate the posterior distribution. MCMC algorithms are  
 438 generally considered “exact” posterior inference algorithms since the approximation error can be  
 439 arbitrarily small when the number of samples from the posterior distribution is large.

| Unknown parameters  | Priors                                                                    | Hyper-priors                                                                                                                                                    |
|---------------------|---------------------------------------------------------------------------|-----------------------------------------------------------------------------------------------------------------------------------------------------------------|
| Retention rate      | $\alpha_i = w_\alpha^T c_i'$ (deterministic)                              | $w_{\alpha,0} \sim \text{Normal}(\mathbf{0}, 1)$<br>$w_{\alpha,1:4} \sim \text{Normal}(\mathbf{0}, 0.1\mathbf{I})$                                              |
| Learning rate       | $\beta_i \sim \text{Normal}_{[0,\infty)}(w_\beta^T c_i', \sigma_\beta^2)$ | $w_{\gamma,0} \sim \text{Normal}(\mathbf{0}, 1)$<br>$w_{\beta,1:4} \sim \text{Normal}(\mathbf{0}, 0.1\mathbf{I})$<br>$\sigma_\beta \sim \text{HalfNormal}(0.5)$ |
| Self-training rate  | $\gamma_i = w_\gamma^T c_i'$ (deterministic)                              | $w_{\gamma,0} \sim \text{Normal}(\mathbf{0}, 1)$<br>$w_{\gamma,1:4} \sim \text{Normal}(\mathbf{0}, 0.1\mathbf{I})$                                              |
| Process noise scale |                                                                           | $\sigma_x \sim \text{HalfNormal}(1)$                                                                                                                            |

440 **Table 2.** Bayesian model for unknown parameters in the individualized dynamics. “Priors” are the prior distributions for the  
 441 individual level parameters conditioned on population level parameters. “Hyper-priors” specify the prior distributions for  
 442 population level parameters. The process noise scale  $\sigma_x$  is shared across patients and is used to compute the likelihood of outcome  
 443 trajectories according to the transition dynamics in Table 1. Known parameters are omitted. The (4-dimensional) zero-vector is  
 444 denoted by  $\mathbf{0}$  and the (4-by-4 identity matrix is denoted by  $\mathbf{I}$ .

445 **Planning for optimal treatment policy under constraints.** Given a sampled parameter  $\tilde{\theta}$ , PSCRL solves  
446 the associated constrained planning problem subject to a total rehabilitation budget  $\bar{B} = 60$  and a  
447 stepwise dose limit  $\bar{b} = 20$ . The dose limit restricts the MDP's action space to  $\mathcal{A} = [0: \bar{b}] = \{0, 1, \dots, \bar{b}\}$ ,  
448 which simplifies the planning problem. Handling the budget constraint requires long-term planning, as  
449 choosing a dose now may affect dosing options in the future. A simple solution for this is to consider an  
450 MDP with an expanded state space  $\mathcal{S}' = \mathcal{S} \times [0: \bar{B}]$  with deterministic transitions in the remaining budget  
451 component(76)]. Then, an optimal policy for the *expanded* MDP is equivalent to an optimal constrained  
452 policy for the original MDP. Although the state space for the MAL model is continuous, in this simulation  
453 example, we approximately solve the constrained planning problem using Dynamic Programming (DP)  
454 with the expanded state space and discretized MAL outcomes (100 bins of width 0.05 covering the range  
455 of MAL [0,5]).

#### 456 *Evaluation protocol*

457 **Regret (performance metric).** To rigorously examine the potential benefit of AI-based precision  
458 rehabilitation, we measured the performance of a learning agent by a “regret” metric (similar to (64)). In  
459 this work, we define the *regret* of an RL agent after seeing  $N$  patients as:

$$\text{Reg}_N = \sum_{i=1}^N (V_i^*(s_{i,1}) - V_i^{\text{ALG}}(s_{i,1}))$$

460 where  $s_{i,1}$  is a fixed (pre-generated) initial state for patient  $i$ ,  $V_i^*(s_{i,1})$  is the expected return of a *theoretically*  
461 *optimal policy* associated with patient  $i$  starting at  $s_{i,1}$ , and  $V_i^{\text{ALG}}(s_{i,1})$  is the expected return for treating the  
462 same patient using treatments recommended by the algorithm. The expectation (in expected return) is  
463 taken over the randomness of state transitions (i.e., process noise) and treatments. A lower regret is  
464 preferred as it suggests that (in expectation) the overall treatment effect is closer to the theoretically



465 optimal effect. Because patients are heterogenous (represented by different parameters  $\theta_i^*$ ), the optimal  
466 treatment policy and its corresponding value vary across patients. Due to infinite state space, non-linear  
467 (stochastic) transitions, and constraints, both  $V_i^*$  and  $V_i^{\text{ALG}}$  are impossible to compute exactly. We thus  
468 estimated  $V_i^*$  with a near-optimal benchmark obtained using dynamic programming with access to the  
469 ground-truth parameter  $\theta_i^*$ . Notice that  $V_i^{\text{ALG}}$  also depends on the randomness of the algorithm (which in  
470 turn depends on all data from past  $i - 1$  patients). We estimated  $V_i^{\text{ALG}}$  by averaging over the results from  
471 10 independent runs of the algorithm.

472 **Comparison with non-adaptive treatment (benchmarks).** We compare the regret performance of PSCRL  
473 against three non-adaptive benchmark treatment policies: Uniform, Increasing, and Decreasing. For any  
474 patient, Uniform distributes doses evenly throughout the treatment horizon while Increasing and  
475 Decreasing administer doses in an increasing and decreasing manner in fixed steps (respectively).

476 **Comparison of PSCRL with and without within-patient learning.** By updating the patient model using  
477 both covariate data at baseline and all measurement data during training, PSCRL is self-improving both at  
478 the patient and population levels. That is, as the database of past patients expands, PSCRL can  
479 recommend treatment policies that are increasingly effective in improving functional gains for any new  
480 patient, while continuously improving the policy by finetuning the (Bayesian) model with incoming  
481 patient-specific data over time and across the patient population. To test the effect of individual level  
482 learning when new outcome data becomes available, we investigated the performance of a simplified  
483 version of PSCRL (dubbed PSCRL-reduced) that only constructs a patient model and plans accordingly  
484 once at the intake stage for every patient. In other words, there is no within-patient learning and  
485 replanning in the reduced-PSCRL.

486 **Fixed patient sequence.** Notice that in the CMDP formulation, the expected return of an agent (or a  
487 treatment policy) may vary significantly between patients due to different individualized transition  
488 functions and different initial states. Hence, to avoid unnecessary variations in the performance metric, we  
489 evaluated the agent and the benchmark treatments with a fixed sequence of synthetic patients. The patient  
490 sequence is generated in advance by the simulator according to the data-generating process specified in  
491 Supplementary Material B.

492 **Average return on the population level.** We further measured the performance of an agent (or a treatment  
493 policy) by its *average return* when treating the patient population. The average return was evaluated by  
494 averaging over the expected return of the agent (or a policy) on 50 held-out patients. The held-out patients  
495 were pre-generated from the same distribution as the patients occurred during the learning stage. This  
496 metric is particularly useful to evaluate the performance of an RL agent with different levels of simulated  
497 clinical experience (i.e., number of past patients in its database).

## 498 **Results**

### 499 **Evidence of effective, personalized treatments with step-by-step replanning**

500 In Figure 2, we illustrate the model predictions and treatment policies proposed by PSCRL for two  
501 synthetic patients along with the history of the posterior distribution of the learning rate  $\beta_i$ . The  
502 progression of the predicted trajectories is presented in Fig2A-C (light blue) for timesteps  $t = 1, 7, 13$   
503 (respectively). Because at the initial timestep ( $t = 1$ , shown in Figure 2A), the individual level posterior  
504 was based on the data from past patients only, the posterior on  $\beta_i$  (shown in Figure 2D) was wide and the  
505 estimated distribution of future predicted outcomes (following the current policy  $\pi^{\bar{\theta}_{i,1}}$ ) deviate rather  
506 significantly from the ground-truth (light orange in Fig 4A-B), indicating a lack of knowledge on the

507 current patient. By learning from incoming patient data, PSCRL quickly improves its estimate of the  
 508 patient model, as reflected by a narrower posterior on  $\beta$  and more accurate predictions (as shown in  
 509 Figure 2B) by the midpoint of the treatment horizon ( $t = 7$ ). As a result of an improved patient model,  
 510 PSCRL's treatment recommendations became increasingly effective, leading to higher (expected) returns  
 511 (see patient indices in top right of each panel) for treating both patients.

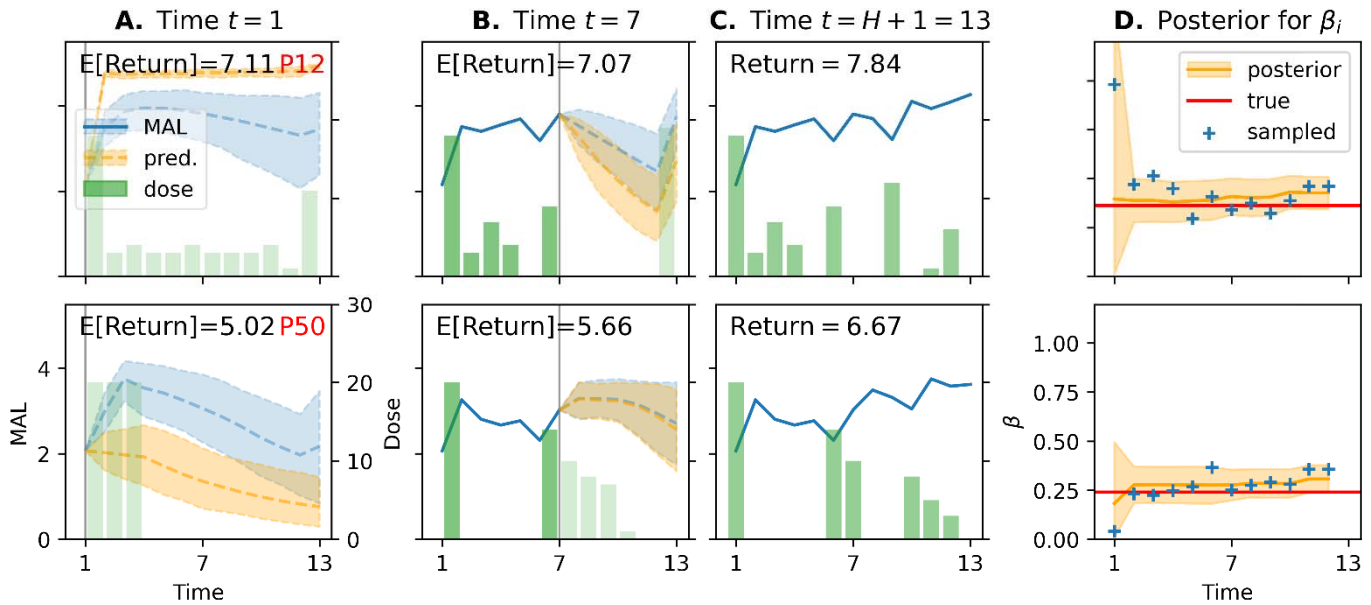

512  
 513 **Figure 2.** Simulation of two patients illustrating updates of model predictions and recommended treatment plans from PSCRL. A-  
 514 C. Observed, predicted, and potential (future) trajectories at initial (A), midpoint (B), and post-treatment (C) timesteps. Solid  
 515 blue line: Observed MAL outcomes. Light blue: Potential future outcomes with means (dashed line) and 95% confidence  
 516 intervals (shaded) as generated by the true model with parameter  $\beta$  assuming that the patient would follow policy  $\pi$ . Light  
 517 orange: Predicted future outcomes with means (dashed line) and 95% prediction intervals (shaded) as generated by the patient  
 518 model  $\hat{m}$  and policy  $\hat{\pi}$ . Solid green bars: Past (actual) treatments. Light green bars: Example of future treatments assuming  
 519 the patient follows  $\hat{m}$  (without updates from PSCRL). Notice how future treatments change as PSCRL continuously refines its  
 520 policy with the new patient data. Vertical gray line: Indicator of the current timestep. D. Distribution of the learning rate  
 521 parameter  $\beta$  (see Table 2) as a function of time during treatment. Orange: Posterior distribution (mean and 95% credible interval)  
 522 of the learning rate, as estimated by PSCRL at each timestep. Blue cross: Sampled parameter used for planning by PSCRL. Red:  
 523 True parameter.

## 524 Improved average return with a larger database

525 Figure 3 shows the performance of PSCRL with and without within-patient learning with respect to the  
526 number of past patients in the database. The database consisted of contexts and trajectories  $(c_{1:n}, \tau_{1:n})$   
527 from past  $n$  patients. PSCRL's adaptive treatments consistently outperformed the Uniform treatment  
528 policy even when the database size is small. Note that, in these simulations, the improvement in  
529 performance over time was small as the performance was already close to the theoretically optimal value  
530 at the beginning of the experiment thanks to individual level learning and replanning (i.e., policy updates)  
531 at each time step. In contrast, the reduced PSCRL with no within-patient learning and replanning initially  
532 showed worse performance than the non-adaptive *Uniform* policy. However, after interacting with about  
533 10 synthetic patients, the performance of reduced PSCRL clearly improved and became consistently better  
534 than the *Uniform* policy. This result clearly shows the algorithm's ability to learn and generalize the  
535 information between patients in the proposed setup.

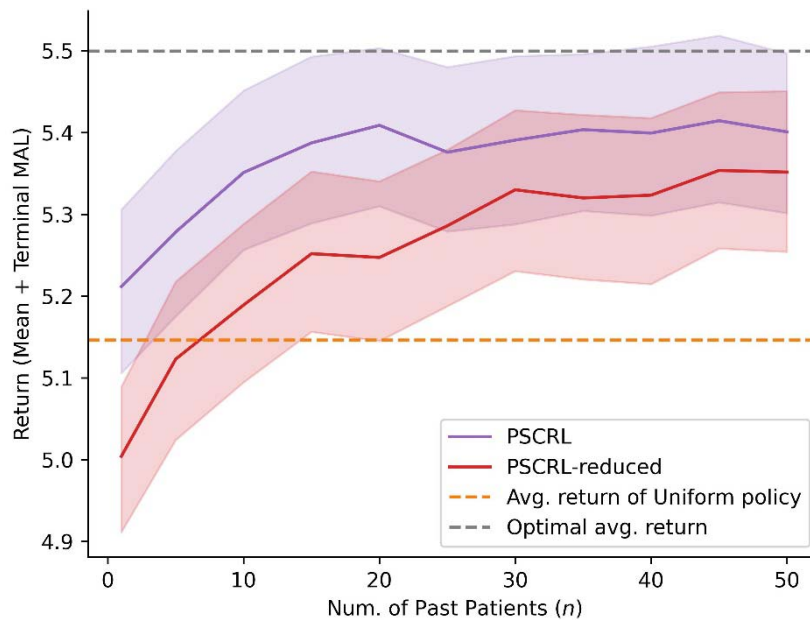

536

537 **Figure 3.** Average return of PSCRL with increasingly larger databases compared to benchmarks. **Purple:** Average return (solid)  
538 with 95% CI (shaded) for PSCRL. **Red:** Average return (solid) with 95% CI (shaded) for PSCRL-reduced (which does not perform

539 within-patient learning). Average returns for PSCRL and PSCRL-reduced were computed by first computing the expected return  
540 of the agent (with different numbers of past patients in the database) with 40 simulations on each held-out patient and then by  
541 taking the average over all 50 held-out patients. **Orange (dashed)**: Average return for *Uniform* benchmark treatment policy. **Grey**  
542 **(dashed)**: Optimal average return, computed by averaging over the expected return of individualized optimal policies (obtained  
543 using ground-truth parameters). Expected returns for *Uniform* and optimal policies were estimated using 1000 simulations.

544 We then tested how well PSCRL could estimate the context parameters linking each covariate to the main  
545 model parameters in the state space model. As discussed above, the exact relationship between contexts  
546 and recovery dynamics was unknown to the clinician-AI team and had to be learned from sequential  
547 patient data (as each patient is associated with a single measurement for each covariate). As shown in  
548 Supplementary Material C, Figure S1, the posterior distribution converges to the true values, showing that  
549 PSCRL achieves learning on the population level via accurate estimation of the relationships between  
550 contextual covariates and patient parameters.

## 551 **Overall expected gain with AI-determined treatments**

552 The overall quality of the treatment is measured by the regret (see above). Figure 4 clearly shows the  
553 superiority of PSCRL's treatments against the benchmark treatments in minimizing regret after treating  
554 the same sequence of  $N = 100$  patients. The benchmarks correspond to non-adaptive, "one-size-fits-all"  
555 dosing schedules and thus incur high regret when treating a heterogenous patient population. In contrast,  
556 even without step-by-step replanning, PSCRL-reduced learns to incur low regret, which indicates that it  
557 can still identify high-quality treatment policies for new patients by leveraging the context. The full PSCRL  
558 algorithm incurred the least regret, indicating that policies proposed by PSCRL were the closest to a  
559 hypothetical clinician with perfect information about each patient a priori.

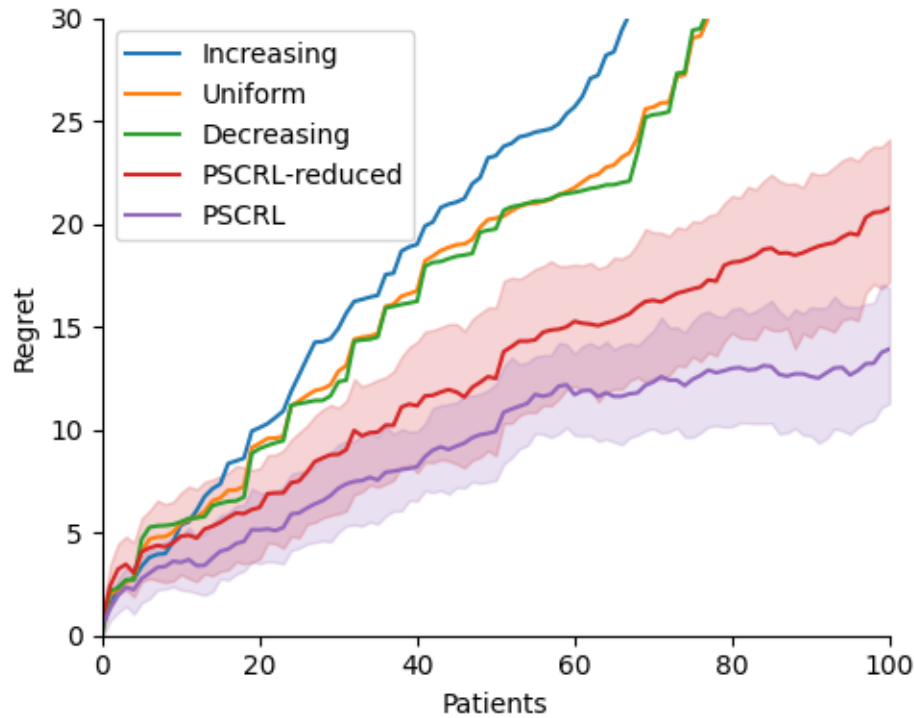

560

561 **Figure 4. Comparison of cumulative regret for PSCRL and benchmark treatments. Solid lines:** (cumulative) regret, estimated  
562 from results of 10 independent simulations for an RL agent or 1000 simulations for a benchmark treatment policy. **Shaded region:**  
563 95% CI of the regret (omitted for benchmarks for readability). Given the horizon  $T$  and the total budget  $B$  therapy  
564 hours. *Uniform* allocates  $B/T$  therapy hours at each timestep  $t$  for any patient  $i$  (regardless of the patient’s state).  
565 *Decreasing* sets  $d_t = B/T$ ,  $d_{t+1} = B/(2T)$ , and  $d_{t+2} = B/(3T)$  therapy hours (and 0 dose when  $t$  is even) for any patient  $i$ .  
566 *Increasing* uses the reversed dose schedule of *Decreasing*.

## 567 Discussion

568 Determining the optimal sequential treatment plan that maximizes long-term outcomes for each patient  
569 post-stroke is daunting even for experienced clinicians because of the multiple scheduling factors that  
570 modulate recovery, the high between-patient variability, and the multiple scheduling constraints and  
571 patient preferences. Thus, to enhance the effectiveness of rehabilitation, we proposed a collaborative AI  
572 precision rehabilitation system that uses model-based RL. The system addresses challenges specific to

573 precision rehabilitation system by 1) utilizing an interpretable, dynamical, Bayesian patient model that  
574 takes into account the time-varying processes of stroke recovery at different time scales modulated by  
575 treatment decisions, 2) updating the patient model via contextual and hierarchical modeling, 3)  
576 collaborating with clinicians and patients to customize the recommended plan based on clinical judgment,  
577 constraints, and preferences, and 4) planning a sequential treatment with respect to the context,  
578 constraints, and uncertainties in the patient model. To design such a system, we extended current medical  
579 RL applications based on MDP (7-10, 63, 77) and bandit models (equivalent to a 1-step MDP) (69, 78), and  
580 formalized precision rehabilitation as a sequential decision-making problem under a Contextual Markov  
581 Decision Process (CMDP)(64). CMDP allows explicit modeling of longitudinal treatment-response data  
582 for heterogeneous patients post-stroke via context-dependent dynamics. We further extended the CMDP  
583 framework with realistic treatment constraints (e.g., the total dose and maximum bi-weekly dose). Finally,  
584 towards a concrete implementation of our rehabilitation system, we proposed a novel Posterior Sampling  
585 for Contextual RL (PSCRL) algorithm to balance exploration and exploitation in a CMDP while tackling  
586 the treatment constraints, which can be specified dynamically by the clinician-patient team at any time.  
587 Importantly, the PSCRL algorithm is continuously learning (i.e., self-improving) at the patient and  
588 population levels by leveraging a growing database containing data from current and previous patients.  
589 We then presented a simulation study applying PSCRL to treat a highly variable population of 100  
590 patients. The simulation utilized a previous hierarchical Bayesian state-space patient model of chronic  
591 stroke (29) expanded to include a context made of four covariates. Our results confirmed the multi-level  
592 learning capability of PSCRL as its recommended treatment plans became increasingly more effective in  
593 improving functional gains for each patient over time and across the patient population.

594 A strength of the Bayesian approach for patient modeling is that it provides a simple solution to missing  
595 data, which are treated as parameters to estimate. For instance, the model can be designed to incorporate  
596 covariates derived from neuroimaging to generate precise predictions. If, however, there is no brain scan  
597 available for a particular patient, the predictions may be (slightly) less accurate, but all the other data for  
598 this patient can still be used without any changes to the model. Thus, the Bayesian approach provides  
599 great flexibility for predictions with whichever data are available at any time for a specific patient. Further,  
600 hierarchical modeling, by sharing information across patients, improves prediction for new patients,  
601 especially early in the rehabilitation process, and therefore improves the efficacy of treatments.

## 602 **Limitations and future work**

603 In future work, a large and variable rehabilitation dataset will be essential to train and validate the AI  
604 algorithm, notably by identifying the scheduling and individual factors that significantly affect outcomes.  
605 Hundreds of participants with large ranges of initial deficits will be needed. The database will contain  
606 baseline demographics, clinical, and lesion covariates, repeated clinical outcome measurements (i.e., every  
607 two weeks), and fine-grained practice data. Connected objects for rehabilitation (79), wearable sensors  
608 (80), or rehabilitation robots (41) can provide doses of treatment (in number of repetitions) for different  
609 tasks that can be used to update the model dynamics.

610 These data will be used to update the model, as the synthetic patients in the current work were  
611 represented by simple models while actual patients are much more complex, variable, and harder to  
612 model. Further extension of the patient model to acute and sub-acute phases post-stroke should include a  
613 time-dependent “plasticity state” to model the critical window of plasticity as well as the spontaneous  
614 recovery state, both modulated by covariates. In addition, in our current implementation, the algorithm  
615 made simplistic dose recommendations. Practically, the advantage of this approach is that only the actual



616 dose in hours of treatment would need to be recorded and inputted into the model. However, in practice,  
617 treatment needs to be targeted to address the main limitations in UE function and preferences for specific  
618 activities for the patient to practice. Thus, an extension of our algorithm should at least provide  
619 recommendations for targeted training, such as for distal and proximal UE tasks.

620 The hierarchical Bayesian patient dynamics model used in our simulations was developed for chronic  
621 stroke UE functions based on a subjective patient-reported instrument, the MAL. Future models should  
622 consider widely used, objective, and validated functional clinical assessment scores, such as the ARAT,  
623 and account for the variability in recovery in impairment, function, and participation post-stroke. In a  
624 concurrent work, Cotton et al. (2024)(81) recently presented a related perspective to precision  
625 rehabilitation, advocating for the use of structural causal model for treatment optimization. The causal  
626 models would link the plastic process and neural structure underlying the rehabilitation process to  
627 detailed measurements of impairment of body structure and function to real functional activities of daily  
628 living and participation. Whereas the data requirement for such complex models would be very large,  
629 causal models, thanks to their transportability property, can be fit to a mixture of heterogeneous data.(81)  
630 Nonetheless, we note that MDP (and notably POMDP introduced below) encapsulates state-space models  
631 (such as (29)) and can be seen as simple structural causal models focusing on the interaction between a  
632 few variables at each timestep. Structural causal models can further augment MDPs, e.g., by decomposing  
633 the state and imposing structural causal assumptions among state components and the reward (82).

634 In our simulation, we assumed no measurement noise to accommodate the MDP model with fully  
635 observed states, i.e.,  $o_{i,t} = s_{i,t}$ . For real-world deployment, it could be beneficial to consider a stochastic  
636 observation function  $\mathbb{O}(o_t|s_t)$  to reflect the measurement errors in the clinical outcomes (e.g. ARAT and  
637 MAL); this corresponds to a Partially Observable MDP (POMDP) where the patient state  $s_{i,t}$  (e.g., motor

638 memory) is hidden from the clinician-AI team and partially revealed through the outcome  $o_t$ . However,  
639 RL in a POMDP is known to be computationally intractable in general. In particular, a theoretically  
640 optimal policy for POMDP needs to be full-history dependent, i.e., it suggests treatments based on the  
641 entire patient history. In practice, when a single observed outcome  $o_{i,t}$  is insufficient for making a clinical  
642 decision, one may consider treatment policies that take as input a sequence of measurements from a few  
643 previous timesteps.

644 We finally note that POMDPs for precision rehabilitation are highly related to previous work on Dynamic  
645 Treatment Regime (DTR)(83). As reviewed in(84), constructing a DTR involves solving a decision  
646 problem that is mathematically equivalent to a POMDP, and indeed an optimal DTR is equivalent to an  
647 optimal (i.e., reward-maximizing) policy under a POMDP. Thus, we may interpret PSCRL as an algorithm  
648 that aims to *learn* the optimal DTR in a CMDP where the recovery dynamics are unknown and patient-  
649 dependent. Similar to PSCRL, a posterior sampling-based algorithm, PS-DTR, has been applied to the  
650 “causal RL” problem of learning an optimal dynamic treatment regime for an unknown structural causal  
651 model (85). Future work is needed to validate and compare these two algorithms in identifying the  
652 optimal rehabilitation plan in real life with high data efficiency and low regret, i.e., the least amount of  
653 trial and error. Note that these two RL algorithms are “online” in the sense that they continuously adjust  
654 the current treatment plan based on the patient data, and the updated plans are deployed to generate new  
655 observations. Online RL is suitable for precision rehabilitation as the interventions pose minimal risk; the  
656 clinician retains the autonomy for making treatment decisions and may reject the algorithm's proposal at  
657 any time. Additional safety can be guaranteed by adjusting the constraints in our framework, in which  
658 case PSCRL can generate updated treatment plans accordingly.

## 659 **Conclusion**

660 With self-improving capabilities, our AI-based system has the potential to play a key role in novel learning  
661 health systems in rehabilitation. As discussed above, stroke outcomes vary significantly based on factors  
662 such as the type, location, and severity. Making progress in precision medicine is crucial in stroke  
663 rehabilitation because it will enable the creation of personalized treatment plans tailored to each patient's  
664 unique needs. Our collaborative AI system can transform stroke rehabilitation into a more adaptive and  
665 dynamic process, significantly improving patient outcomes and expanding the possibilities of  
666 personalized healthcare by providing a translatable framework for other clinical fields in which repeated  
667 treatments are needed to optimize outcomes.

## 668 **Declarations**

### 669 **Ethics approval and consent to participate**

670 Not applicable

### 671 **Consent for publication**

672 Not applicable

### 673 **Availability of data and materials**

674 Not applicable

### 675 **Competing interests**

676 Not applicable

## 677 **Funding**

678 This work was funded by grant NIH R56 NS126748 to NS.

## 679 **Authors' contributions**

680 DY and NS conceived the work and contributed to the design of the work, data interpretation, and  
681 drafting of the manuscript. DY developed and implemented the PSCRL algorithm, performed the  
682 analyses, and ran the simulations. HL contributed to the algorithm development and revision of the  
683 manuscript. CW conceived the work, contributed to the design of the work and revision of the  
684 manuscript. All authors read and approved the final manuscript.

## 685 **Acknowledgments**

686 We thank David Reinkensmeyer, Emily Rosario, and Sook-Lei Liew for fruitful discussions about our  
687 framework and Rahul Jain for discussion about the PSCRL algorithm.

## 688 **References**

- 689 1. Benjamin EJ, Muntner P, Alonso A, Bittencourt MS, Callaway CW, Carson AP, et al. Heart Disease and  
690 Stroke Statistics-2019 Update: A Report From the American Heart Association. *Circulation*.  
691 2019;139(10):e56-e528.
- 692 2. Lum PS, Mulroy S, Amdur RL, Requejo P, Prilutsky BI, Dromerick AW. Gains in upper extremity  
693 function after stroke via recovery or compensation: Potential differential effects on amount of real-world  
694 limb use. *Top Stroke Rehabil*. 2009;16(4):237-53.
- 695 3. Niemi ML, Laaksonen R, Kotila M, Waltimo O. Quality of life 4 years after stroke. *Stroke*.  
696 1988;19(9):1101-7.
- 697 4. Boyd LA, Hayward KS, Ward NS, Stinear CM, Rosso C, Fisher RJ, et al. Biomarkers of Stroke Recovery:  
698 Consensus-Based Core Recommendations from the Stroke Recovery and Rehabilitation Roundtable.  
699 *Neurorehabil Neural Repair*. 2017;31(10-11):864-76.
- 700 5. French MA, Daley K, Lavezza A, Roemmich RT, Wegener ST, Raghavan P, Celnik P. A Learning Health  
701 System Infrastructure for Precision Rehabilitation After Stroke. *Am J Phys Med Rehabil*. 2023;102 :S56-S60.
- 702 6. Hamburg MA, Collins FS. The path to personalized medicine. *N Engl J Med*. 2010;363(4):301-4.

- 703 7. Eckardt JN, Wendt K, Bornhauser M, Middeke JM. Reinforcement Learning for Precision Oncology.  
704 Cancers (Basel). 2021;13(18).
- 705 8. Tosca EM, De Carlo A, Ronchi D, Magni P. Model-Informed Reinforcement Learning for Enabling  
706 Precision Dosing Via Adaptive Dosing. Clin Pharmacol Ther. 2024;116(3):619-36.
- 707 9. Ribba B, Dudal S, Lave T, Peck RW. Model-Informed Artificial Intelligence: Reinforcement Learning for  
708 Precision Dosing. Clin Pharmacol Ther. 2020;107(4):853-7.
- 709 10. Komorowski M, Celi LA, Badawi O, Gordon AC, Faisal AA. The Artificial Intelligence Clinician learns  
710 optimal treatment strategies for sepsis in intensive care. Nat Med. 2018;24(11):1716-20.
- 711 11. Murphy TH, Corbett D. Plasticity during stroke recovery: from synapse to behaviour. Nat Rev  
712 Neurosci. 2009;10(12):861-72.
- 713 12. Bains AS, Schweighofer N. Time-sensitive reorganization of the somatosensory cortex post-stroke  
714 depends on interaction between Hebbian plasticity and homeoplasticity: a simulation study. Journal of  
715 neurophysiology. 2014;jn 00433 2013.
- 716 13. Duncan PW, Goldstein LB, Matchar D, Divine GW, Feussner J. Measurement of motor recovery after  
717 stroke. Outcome assessment and sample size requirements. Stroke. 1992;23(8):1084-9.
- 718 14. Duncan PW, Lai SM, Keighley J. Defining post-stroke recovery: implications for design and  
719 interpretation of drug trials. Neuropharmacology. 2000;39(5):835-41.
- 720 15. Kleim JA, Jones TA. Principles of experience-dependent neural plasticity: implications for rehabilitation  
721 after brain damage. J Speech Lang Hear Res. 2008;51(1):S225-39.
- 722 16. Kwakkel G, van Peppen R, Wagenaar RC, Wood Dauphinee S, Richards C, Ashburn A, et al. Effects of  
723 augmented exercise therapy time after stroke: a meta-analysis. Stroke. 2004;35(11):2529-39.
- 724 17. Lohse KR, Lang CE, Boyd LA. Is more better? Using metadata to explore dose-response relationships in  
725 stroke rehabilitation. Stroke. 2014;45(7):2053-8.
- 726 18. Daly JJ, McCabe JP, Holcomb J, Monkiewicz M, Gansen J, Pundik S. Long-Dose Intensive Therapy Is  
727 Necessary for Strong, Clinically Significant, Upper Limb Functional Gains and Retained Gains in  
728 Severe/Moderate Chronic Stroke. Neurorehabil Neural Repair. 2019;33(7):523-37.
- 729 19. Ward NS, Brander F, Kelly K. Intensive upper limb neurorehabilitation in chronic stroke: outcomes  
730 from the Queen Square programme. J Neurol Neurosurg Psychiatry. 2019;90(5):498-506.
- 731 20. Winstein C, Kim B, Kim S, Martinez C, Schweighofer N. Dosage Matters. Stroke. 2019;50(7):1831-7.
- 732 21. Kwakkel G, Wagenaar RC, Koelman TW, Lankhorst GJ, Koetsier JC. Effects of intensity of rehabilitation  
733 after stroke. A research synthesis. Stroke. 1997;28(8):1550-6.
- 734 22. Jeffers MS, Karthikeyan S, Gomez-Smith M, Gasinzigwa S, Achenbach J, Feiten A, Corbett D. Does  
735 Stroke Rehabilitation Really Matter? Part B: An Algorithm for Prescribing an Effective Intensity of  
736 Rehabilitation. Neurorehabil Neural Repair. 2018;32(1):73-83.
- 737 23. Horn SD, DeJong G, Smout RJ, Gassaway J, James R, Conroy B. Stroke rehabilitation patients, practice,  
738 and outcomes: is earlier and more aggressive therapy better? Arch Phys Med Rehabil. 2005;86:S101-S14.
- 739 24. Wolf SL, Thompson PA, Winstein CJ, Miller JP, Blanton SR, Nichols-Larsen DS, et al. The EXCITE stroke  
740 trial: comparing early and delayed constraint-induced movement therapy. Stroke. 2010;41(10):2309-15.
- 741 25. Dromerick AW, Lang CE, Birkenmeier RL, Wagner JM, Miller JP, Videen TO, et al. Very Early  
742 Constraint-Induced Movement during Stroke Rehabilitation (VECTORS): A single-center RCT. Neurology.  
743 2009;73(3):195-201.
- 744 26. Bland ST, Schallert T, Strong R, Aronowski J, Grotta JC, Feeney DM. Early exclusive use of the affected  
745 forelimb after moderate transient focal ischemia in rats : functional and anatomic outcome. Stroke.  
746 2000;31(5):1144-52.

- 747 27.Dromerick AW, Geed S, Barth J, Brady K, Giannetti ML, Mitchell A, et al. Critical Period After Stroke  
748 Study (CPASS): A phase II clinical trial testing an optimal time for motor recovery after stroke in humans.  
749 Proc Natl Acad Sci U S A. 2021;118(39).
- 750 28.Ramos Munoz EJ, Swanson VA, Johnson C, Anderson RK, Rabinowitz AR, Zondervan DK, et al. Using  
751 Large-Scale Sensor Data to Test Factors Predictive of Perseverance in Home Movement Rehabilitation:  
752 Optimal Challenge and Steady Engagement. *Frontiers in neurology*. 2022;13:896298.
- 753 29.Schweighofer N, Ye D, Luo H, D'Argenio DZ, Winstein C. Long-term forecasting of a motor outcome  
754 following rehabilitation in chronic stroke via a hierarchical bayesian dynamic model. *J Neuroeng Rehabil*.  
755 2023;20(1):83.
- 756 30.Meyer S, Verheyden G, Brinkmann N, Dejaeger E, De Weerdts W, Feys H, et al. Functional and motor  
757 outcome 5 years after stroke is equivalent to outcome at 2 months: follow-up of the collaborative  
758 evaluation of rehabilitation in stroke across Europe. *Stroke*. 2015;46(6):1613-9.
- 759 31.Dettmers C, Teske U, Hamzei F, Uswatte G, Taub E, Weiller C. Distributed form of constraint-induced  
760 movement therapy improves functional outcome and quality of life after stroke. *Arch Phys Med Rehabil*.  
761 2005;86(2):204-9.
- 762 32.Schweighofer N, Lee JY, Goh HT, Choi Y, Kim SS, Stewart JC, et al. Mechanisms of the contextual  
763 interference effect in individuals poststroke. *Journal of neurophysiology*. 2011;106(5):2632-41.
- 764 33.Han CE, Arbib MA, Schweighofer N. Stroke rehabilitation reaches a threshold. *PLoS Comput Biol*.  
765 2008;4(8):e1000133.
- 766 34.Schweighofer N, Han CE, Wolf SL, Arbib MA, Winstein CJ. A functional threshold for long-term use of  
767 hand and arm function can be determined: predictions from a computational model and supporting data  
768 from the Extremity Constraint-Induced Therapy Evaluation (EXCITE) Trial. *Physical therapy*.  
769 2009;89(12):1327-36.
- 770 35.Hidaka Y, Han CE, Wolf SL, Winstein CJ, Schweighofer N. Use it and improve it or lose it: interactions  
771 between arm function and use in humans post-stroke. *PLoS Comput Biol*. 2012;8(2):e1002343.
- 772 36.Schwerz de Lucena D, Rowe J, Chan V, Reinkensmeyer DJ. Magnetically Counting Hand Movements:  
773 Validation of a Calibration-Free Algorithm and Application to Testing the Threshold Hypothesis of Real-  
774 World Hand Use after Stroke. *Sensors (Basel)*. 2021;21(4).
- 775 37.MacLellan CL, Keough MB, Granter-Button S, Chernenko GA, Butt S, Corbett D. A critical threshold of  
776 rehabilitation involving brain-derived neurotrophic factor is required for poststroke recovery.  
777 *Neurorehabil Neural Repair*. 2011;25(8):740-8.
- 778 38.Cramer SC. Repairing the human brain after stroke: I. Mechanisms of spontaneous recovery. *Ann*  
779 *Neurol*. 2008;63(3):272-87.
- 780 39.Cramer SC. Repairing the human brain after stroke. II. Restorative therapies. *Ann Neurol*.  
781 2008;63(5):549-60.
- 782 40.Wang C, Winstein C, D'Argenio DZ, Schweighofer N. The Efficiency, Efficacy, and Retention of Task  
783 Practice in Chronic Stroke. *Neurorehabil Neural Repair*. 2020;34(10):881-90.
- 784 41.Burke Quinlan E, Dodakian L, See J, McKenzie A, Le V, Wojnowicz M, et al. Neural function, injury, and  
785 stroke subtype predict treatment gains after stroke. *Ann Neurol*. 2015;77(1):132-45.
- 786 42.Cramer SC, Parrish TB, Levy RM, Stebbins GT, Ruland SD, Lowry DW, et al. Predicting functional gains  
787 in a stroke trial. *Stroke*. 2007;38(7):2108-14.
- 788 43.Varghese R, Gordon J, Sainburg RL, Winstein CJ, Schweighofer N. Adaptive control is reversed  
789 between hands after left hemisphere stroke and lost following right hemisphere stroke. *Proc Natl Acad Sci*  
790 *U S A*. 2023;120(6):e2212726120.

- 791 44.Lindenberg R, Zhu LL, Ruber T, Schlaug G. Predicting functional motor potential in chronic stroke  
792 patients using diffusion tensor imaging. *Hum Brain Mapp.* 2012;33(5):1040-51.
- 793 45.Cassidy JM, Tran G, Quinlan EB, Cramer SC. Neuroimaging Identifies Patients Most Likely to Respond  
794 to a Restorative Stroke Therapy. *Stroke.* 2018;49(2):433-8.
- 795 46.Stinear CM, Barber PA, Smale PR, Coxon JP, Fleming MK, Byblow WD. Functional potential in chronic  
796 stroke patients depends on corticospinal tract integrity. *Brain.* 2007;130(Pt 1):170-80.
- 797 47.Kim B, Schweighofer N, Haldar JP, Leahy RM, Winstein CJ. Corticospinal Tract Microstructure Predicts  
798 Distal Arm Motor Improvements in Chronic Stroke. *J Neurol Phys Ther.* 2021;45(4):273-81.
- 799 48.Ingemanson ML, Rowe JR, Chan V, Wolbrecht ET, Reinkensmeyer DJ, Cramer SC. Somatosensory  
800 system integrity explains differences in treatment response after stroke. *Neurology.* 2019;92(10):e1098-  
801 e108.
- 802 49.Park SW, Wolf SL, Blanton S, Winstein C, Nichols-Larsen DS. The EXCITE Trial: Predicting a clinically  
803 meaningful motor activity log outcome. *Neurorehabil Neural Repair.* 2008;22(5):486-93.
- 804 50.Bolognini N, Russo C, Edwards DJ. The sensory side of post-stroke motor rehabilitation. *Restor Neurol*  
805 *Neurosci.* 2016;34(4):571-86.
- 806 51.Rowe JB, Chan V, Ingemanson ML, Cramer SC, Wolbrecht ET, Reinkensmeyer DJ. Robotic Assistance  
807 for Training Finger Movement Using a Hebbian Model: A Randomized Controlled Trial. *Neurorehabil*  
808 *Neural Repair.* 2017;31(8):769-80.
- 809 52.VanGilder JL, Hooyman A, Peterson DS, Schaefer SY. Post-stroke cognitive impairments and  
810 responsiveness to motor rehabilitation: A review. *Curr Phys Med Rehabil Rep.* 2020;8(4):461-8.
- 811 53.Wu J, Quinlan EB, Dodakian L, McKenzie A, Kathuria N, Zhou RJ, et al. Connectivity measures are  
812 robust biomarkers of cortical function and plasticity after stroke. *Brain.* 2015;138(Pt 8):2359-69.
- 813 54.Wu J, Srinivasan R, Burke Quinlan E, Solodkin A, Small SL, Cramer SC. Utility of EEG measures of  
814 brain function in patients with acute stroke. *Journal of neurophysiology.* 2016;115(5):2399-405.
- 815 55.Quinlan EB, Dodakian L, See J, McKenzie A, Stewart JC, Cramer SC. Biomarkers of Rehabilitation  
816 Therapy Vary according to Stroke Severity. *Neural Plast.* 2018;2018:9867196.
- 817 56.Dong Y, Dobkin BH, Cen SY, Wu AD, Winstein CJ. Motor cortex activation during treatment may  
818 predict therapeutic gains in paretic hand function after stroke. *Stroke.* 2006;37(6):1552-5.
- 819 57.Dobkin BH. Fatigue versus activity-dependent fatigability in patients with central or peripheral motor  
820 impairments. *Neurorehabil Neural Repair.* 2008;22(2):105-10.
- 821 58.Wulf G, Lewthwaite R. Optimizing performance through intrinsic motivation and attention for  
822 learning: The OPTIMAL theory of motor learning. *Psychon Bull Rev.* 2016;23(5):1382-414.
- 823 59.Winstein C, Lewthwaite R, Blanton SR, Wolf LB, Wishart L. Infusing motor learning research into  
824 neurorehabilitation practice: a historical perspective with case exemplar from the accelerated skill  
825 acquisition program. *J Neurol Phys Ther.* 2014;38(3):190-200.
- 826 60.Puterman ML. *Markov decision processes: discrete stochastic dynamic programming*: John Wiley &  
827 Sons; 2014.
- 828 61.Sutton RS, Barto AG. *Reinforcement Learning, second edition: An Introduction*: MIT Press; 2018.
- 829 62.Merriam-webster. Dictionary 2002. p. <https://www.merriam-webster.com/>.
- 830 63.Chen S, Qiu X, Tan X, Fang Z, Jin Y. A model-based hybrid soft actor-critic deep reinforcement learning  
831 algorithm for optimal ventilator settings. *Information sciences.* 2022;611:47-64.
- 832 64.Hallak A, Di Castro D, Mannor S. *Contextual Markov decision processes* 2015.
- 833 65.Modi A, Jiang N, Singh S, Tewari A. *Markov decision processes with continuous side information*.  
834 arXiv preprint arXiv:171105726. 2017.
- 835 66.Thompson WR. On the theory of apportionment. *American Journal of Mathematics.* 1935;57(2):450-6.

- 836 67.Russo DJ, Van Roy B, Kazerouni A, Osband I, Wen Z. A tutorial on Thompson sampling. Foundations  
837 and Trends in Machine Learning. 2018;11:1-96.
- 838 68.Russo D, Van Roy B, Kazerouni A, Osband I, Wen Z. A tutorial on Thompson sampling.  
839 arXiv:170702038. 2017.
- 840 69.Tomkins S, Liao P, Klasnja P, Murphy S. Intelligentpooling: Practical Thompson sampling for health.  
841 Machine learning. 2021;110.
- 842 70.Osband I, Russo D, Van Roy B (More) efficient reinforcement learning via posterior sampling. .  
843 Advances in Neural Information Processing Systems; 2013.
- 844 71.Tang D, Ye D, Jain R, Nayyar A, Nuzzo P. Posterior Sampling-based Online Learning for Episodic  
845 POMDPs. ArXiv. 2023.
- 846 72.Trella AL, Zhang KW, Jajal H, Shetty V, Murphy SA. A Deployed Online Reinforcement Learning  
847 Algorithm In An Oral Health Clinical Trial. ArXiv. 2014.
- 848 73.Wolf SL, Winstein CJ, Miller JP, Taub E, Uswatte G, Morris D, et al. Effect of constraint-induced  
849 movement therapy on upper extremity function 3 to 9 months after stroke: the EXCITE randomized  
850 clinical trial. JAMA. 2006;296(17):2095-104.
- 851 74.Hoffman MD, Gelman A. The No-U-Turn sampler: adaptively setting path lengths in Hamiltonian  
852 Monte Carlo. . J Mach Learn Res. 2014;15:1593-623.
- 853 75.Phan D, Pradhan N, Jankowiak M. Composable Effects for Flexible and Accelerated Probabilistic  
854 Programming in NumPyro. ArXiv. 2019.
- 855 76.Boutilier C, Lu T. Budget Allocation using Weakly Coupled, Constrained Markov Decision Processes.  
856 UAI; 2016.
- 857 77.Goh KH, Wang L, Yeow AYZ, Poh H, Li K, Yeow JLL, Tan GYH. Artificial intelligence in sepsis early  
858 prediction and diagnosis using unstructured data in healthcare. Nat Commun. 2021;12(1):711.
- 859 78.Trella AL, Zhang KW, Jajal HN-S, I., Shetty V, Doshi-Velez F, Murphy SA. A Deployed Online  
860 Reinforcement Learning Algorithm In An Oral Health Clinical Trial. 2024.
- 861 79.Swanson VA, Johnson C, Zondervan DK, Bayus N, McCoy P, Ng YFJ, et al. Optimized Home  
862 Rehabilitation Technology Reduces Upper Extremity Impairment Compared to a Conventional Home  
863 Exercise Program: A Randomized, Controlled, Single-Blind Trial in Subacute Stroke. Neurorehabil Neural  
864 Repair. 2023;37(1):53-65.
- 865 80.Adans-Dester CP, Lang CE, Reinkensmeyer DJ, Bonato P. Wearable sensors for stroke rehabilitation. .  
866 Neurorehabilitation Technology2022. p. 467-507.
- 867 81.Cotton RJ, Seamon BA, Segal RL, Davis RD, Sahu A, McLeod MM, et al. A Causal Framework for  
868 Precision Rehabilitation2024; arXiv 2411.03919.
- 869 82.Lu Y, Meisami A, Tewari A. Efficient reinforcement learning with prior causal knowledge. Conference  
870 on Causal Learning and Reasoning 2022.
- 871 83.Murphy SA. Optimal dynamic treatment regimes. Journal of the Royal Statistical Society Series B:  
872 Statistical Methodology. 2003;65:331-55.
- 873 84.Chakraborty B, Murphy SA. Dynamic Treatment Regimes. Annu Rev Stat Appl. 2014;1:447-64.
- 874 85.Zhang J Designing optimal dynamic treatment regimes: A causal reinforcement learning approach.  
875 International conference on machine learning; 2020.
